# Supplementary material for: Changes in Socioeconomic Status as Predictors of Cardiovascular Disease Incidence and Mortality: A 10-Year Follow-Up of a Polish-Population-Based HAPIEE Cohort
Source: MDPI journal article supplement (doi:10.3390/ijerph192215411), 2022-11-21
Supplement: s1 [file s1]

Table S1. SES clusters and distribution of characteristics used for SES index.

| Childhood SES                                                                                                                                                                              |                                                                                                                                                                                                                                          |              |               |                |
|--------------------------------------------------------------------------------------------------------------------------------------------------------------------------------------------|------------------------------------------------------------------------------------------------------------------------------------------------------------------------------------------------------------------------------------------|--------------|---------------|----------------|
| Variable                                                                                                                                                                                   |                                                                                                                                                                                                                                          | Low          | Middle        | High           |
| The highest completed level of education of parents                                                                                                                                        | Father                                                                                                                                                                                                                                   |              |               |                |
|                                                                                                                                                                                            | lower than secondary school                                                                                                                                                                                                              | 2728 (100%)  | 2203 (80.7%)  | 192 (10.0%)    |
|                                                                                                                                                                                            | secondary school                                                                                                                                                                                                                         |              | 0 439 (16.1%) | 916 (47.5%)    |
|                                                                                                                                                                                            | university degree                                                                                                                                                                                                                        |              | 0 86 (3.2%)   | 822 (42.5%)    |
|                                                                                                                                                                                            | Mather                                                                                                                                                                                                                                   |              |               |                |
|                                                                                                                                                                                            | lower than secondary school                                                                                                                                                                                                              | 2728 (100%)  | 2668 (97.8%)  | 0              |
|                                                                                                                                                                                            | secondary school                                                                                                                                                                                                                         |              | 0 56 (2.1%)   | 1567 (81.2%)   |
|                                                                                                                                                                                            | university degree                                                                                                                                                                                                                        |              | 0 3 (0.1%)    | 353 (18.8%)    |
|                                                                                                                                                                                            | Index measuring amenities in childhood, calculated based on questions about which of the following items participants had at age 10 (cold tap water, hot tap water, radio, fridge, own kitchen and own toilet). Median (Q1-Q), range:0-6 | 2 (2-4)      | 4 (2-5)       | 5 (4-6)        |
| Adulthood SES                                                                                                                                                                              |                                                                                                                                                                                                                                          |              |               |                |
|                                                                                                                                                                                            |                                                                                                                                                                                                                                          | Low          | Middle        | High           |
| Highest completed level of education                                                                                                                                                       | lower than secondary school                                                                                                                                                                                                              | 971 (47.8%)  | 624 (34.4%)   | 680 (18.5%)    |
|                                                                                                                                                                                            | secondary school                                                                                                                                                                                                                         | 846 (41.6%)  | 774 (42.7%)   | 1305 (35.5%)   |
|                                                                                                                                                                                            | university degree                                                                                                                                                                                                                        | 215 (10.6%)  | 415 (22.9%)   | 1694 (46.1%)   |
| Current professional position                                                                                                                                                              | owner of a company                                                                                                                                                                                                                       |              | 0             | 0 555 (15.1%)  |
|                                                                                                                                                                                            | employed,                                                                                                                                                                                                                                | 303 (14.9%)  |               | 0 2884 (78.4%) |
|                                                                                                                                                                                            | retired or unemployed                                                                                                                                                                                                                    | 1729 (85.1%) | 1813 (100%)   | 240 (6.5%)     |
| Index of household amenities based on the number of valuable items which a participant had in his household (microwave, washing machine, cottage house etc.) . Median (Q1-Q3), range 0-12. |                                                                                                                                                                                                                                          |              |               |                |
|                                                                                                                                                                                            |                                                                                                                                                                                                                                          | 5 (4-7)      | 6 (5-8)       | 8 (6-9)        |
| Current financial situation (based on two questions:                                                                                                                                       |                                                                                                                                                                                                                                          |              |               |                |
| “How often does it happen not to have enough money for food which you and your family need?”                                                                                               | all the time                                                                                                                                                                                                                             | 116 (5.7%)   |               | 0 0            |
|                                                                                                                                                                                            | often                                                                                                                                                                                                                                    | 539 (26.5%)  |               | 0 58 (1.6%)    |
|                                                                                                                                                                                            | sometimes                                                                                                                                                                                                                                | 687 (33.8%)  |               | 0 230 (6.3%)   |
|                                                                                                                                                                                            | rarely                                                                                                                                                                                                                                   | 466 (22.9%)  |               | 0 394 (10.7%)  |
|                                                                                                                                                                                            | never                                                                                                                                                                                                                                    | 224 (11.0%)  | 1813 (100%)   | 2997 (81.5%)   |
| Do you have any difficulties with paying bills                                                                                                                                             | all the time                                                                                                                                                                                                                             | 155 (7.6%)   |               | 0 0            |
|                                                                                                                                                                                            | often                                                                                                                                                                                                                                    | 460 (22.6%)  |               | 0 129 (3.5%)   |
|                                                                                                                                                                                            | sometimes                                                                                                                                                                                                                                | 621 (30.6%)  |               | 0 376 (10.2%)  |
|                                                                                                                                                                                            | rarely                                                                                                                                                                                                                                   | 376 (18.5%)  |               | 0 391 (10.6%)  |
|                                                                                                                                                                                            | never                                                                                                                                                                                                                                    | 420 (20.7%)  | 1813 (100%)   | 2783 (75.7%)   |

| Table S2. Distributions of age, marital status, smoking, obesity, hypertension, diabetes, hypercholesterolemia, by SES in men. |               |             |            |         |               |            |             |         |                 |                   |                 |                       |         |
|--------------------------------------------------------------------------------------------------------------------------------|---------------|-------------|------------|---------|---------------|------------|-------------|---------|-----------------|-------------------|-----------------|-----------------------|---------|
| Men                                                                                                                            | Childhood SES |             |            |         | Adulthood SES |            |             |         | Social mobility |                   |                 |                       |         |
|                                                                                                                                | Low           | Middle      | High       | P value | Low           | Middle     | High        | P value | Always low      | Downward mobility | Upward mobility | Always middle or high | P value |
| Age [years], x(SD)                                                                                                             | 58 (6.79)     | 57 (7.10)   | 55 (6.63)  | <0.001  | 58 (6.98)     | 63 (5.26)  | 54 (5.75)   | <0.001  | 59 (6.94)       | 57 (6.91)         | 58 (6.69)       | 56 (6.70)             | <0.001  |
| Marital status (in relationship), n(%)                                                                                         | 1149 (88.3)   | 1148 (87.6) | 784 (85.9) | 0.24    | 645 (78.8)    | 753 (88.7) | 1738 (90.7) | <0.001  | 247 (78.4)      | 366 (79.2)        | 886 (91.8)      | 1536 (88.9)           | <0.001  |
| Smoking, n(%)                                                                                                                  |               |             |            |         |               |            |             |         |                 |                   |                 |                       |         |
| Current                                                                                                                        | 443 (34.1)    | 513 (39.1)  | 357 (39.1) | 0.067   | 408 (50.0)    | 234 (27.7) | 694 (36.2)  | <0.001  | 151 (48.2)      | 238 (51.6)        | 285 (29.6)      | 620 (35.9)            | <0.001  |
| Former                                                                                                                         | 449 (34.6)    | 418 (31.9)  | 291 (31.9) |         | 234 (28.7)    | 328 (38.8) | 621 (32.4)  |         | 93 (29.7)       | 128 (27.8)        | 349 (36.2)      | 568 (32.9)            |         |
| Never                                                                                                                          | 406 (31.3)    | 380 (29.0)  | 264 (29.0) |         | 174 (21.3)    | 284 (33.6) | 603 (31.4)  |         | 69 (22.0)       | 95 (20.6)         | 329 (34.2)      | 539 (31.2)            |         |
| Obesity, n(%)                                                                                                                  | 316 (27.2)    | 297 (25.5)  | 167 (20.8) | 0.005   | 180 (25.2)    | 215 (27.8) | 408 (24.1)  | 0.16    | 71 (26.2)       | 97 (24.0)         | 241 (27.7)      | 356 (23.3)            | 0.11    |
| Hypertension, n(%)                                                                                                             | 813 (67.9)    | 770 (64.0)  | 502 (60.4) | 0.002   | 485 (66.7)    | 586 (72.9) | 1042 (59.6) | <0.001  | 195 (71.4)      | 267 (63.7)        | 601 (66.6)      | 980 (61.9)            | 0.007   |
| Diabetes, n(%)                                                                                                                 | 184 (15.7)    | 186 (15.7)  | 101 (12.3) | 0.067   | 132 (18.1)    | 156 (19.7) | 186 (10.9)  |         | 59 (21.2)       | 68 (16.4)         | 120 (13.7)      | 215 (13.8)            | 0.007   |
| Hypercholesterolemia, n(%)                                                                                                     | 872 (76.6)    | 897 (78.3)  | 616 (78.7) | 0.47    | 525 (74.8)    | 590 (77.6) | 1309 (79.1) | 0.07    | 188 (70.9)      | 305 (76.3)        | 670 (78.3)      | 1181 (78.9)           | 0.04    |

| Table S3. Distributions of age, marital status, smoking, obesity, hypertension, diabetes, hypercholesterolemia, by SES in women. |               |            |            |         |               |            |             |         |                 |                   |                 |                       |         |
|----------------------------------------------------------------------------------------------------------------------------------|---------------|------------|------------|---------|---------------|------------|-------------|---------|-----------------|-------------------|-----------------|-----------------------|---------|
| Women                                                                                                                            | Childhood SES |            |            |         | Adulthood SES |            |             |         | Social mobility |                   |                 |                       |         |
|                                                                                                                                  | Low           | Middle     | High       | P value | Low           | Middle     | High        | P value | Always low      | Downward mobility | Upward mobility | Always middle or high | P value |
| Age [years], x(SD)                                                                                                               | 57 (6.81 )    | 56 (6.84 ) | 55 (6.61)  | <0.001  | 58 (6.92)     | 62 (5.35)  | 53 (5.08)   | <0.001  | 58 (6.87)       | 57 (6.88)         | 57 (6.75)       | 55 (6.63)             | <0.001  |
| Marital status (in relationship), n(%)                                                                                           | 985 (69.2)    | 954 (67.6) | 664 (65.7) | 0.19    | 708 (58.6)    | 672 (69.8) | 1268 (72.3) | <0.001  | 285 (60.5)      | 390 (57.8)        | 680 (73.6)      | 1201 (70.4)           | <0.001  |
| Smoking, n(%)                                                                                                                    |               |            |            |         |               |            |             |         |                 |                   |                 |                       |         |
| Current                                                                                                                          | 383 (27.0)    | 444 (31.6) | 333 (32.8) | <0.001  | 411 (34.1)    | 194 (20.2) | 573 (32.7)  | <0.001  | 145 (30.9)      | 249 (36.9)        | 227 (24.6)      | 513 (30.1)            | <0.001  |
| Former                                                                                                                           | 262 (18.4)    | 290 (20.6) | 232 (22.9) |         | 220 (18.2)    | 197 (20.5) | 383 (21.8)  |         | 77 (16.4)       | 133 (19.7)        | 182 (19.7)      | 379 (22.2)            |         |
| Never                                                                                                                            | 776 (54.6)    | 673 (47.8) | 449 (44.3) |         | 575 (47.7)    | 571 (59.4) | 798 (45.5)  |         | 247 (52.7)      | 292 (43.3)        | 514 (55.7)      | 815 (47.7)            |         |
| Obesity, n(%)                                                                                                                    | 465 (36.3)    | 413 (33.0) | 213 (24.2) | <0.001  | 426 (40.3)    | 320 (36.6) | 375 (24.2)  | <0.001  | 186 (45.1)      | 216 (36.5)        | 270 (32.1)      | 399 (26.5)            | <0.001  |
| Hypertension, n(%)                                                                                                               | 752 (56.7)    | 706 (54.5) | 423 (46.6) | <0.001  | 672 (60.4)    | 579 (64.2) | 665 (42.0)  | <0.001  | 282 (64.8)      | 357 (57.5)        | 454 (52.6)      | 749 (48.5)            | <0.001  |
| Diabetes, n(%)                                                                                                                   | 146 (11.3)    | 133 (10.6) | 75 (8.5)   | 0.09    | 146 (13.7)    | 134 (15.1) | 88 (5.7)    | <0.001  | 55 (13.3)       | 78 (13.1)         | 85 (10.0)       | 127 (8.4)             | 0.001   |
| Hypercholesterolemia, n(%)                                                                                                       | 1017 (79.6)   | 951 (76.2) | 659 (75.2) | 0.03    | 823 (78.6)    | 719 (82.6) | 1134 (73.4) | <0.001  | 336 (82.0)      | 446 (76.4)        | 657 (78.3)      | 1134 (75.3)           | 0.03    |
